# Supplementary material
Source: PubMed Central journal article supplement (PMC3739333)
Supplement: aja2010158x1.pdf [file aja2010158x1.pdf]

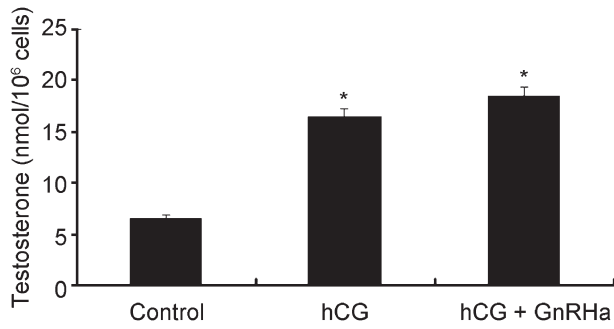

**Supplemental Figure 1** The effects of gonadotropin-releasing hormone agonist (GnRHa) on hCG-stimulated testosterone production. Rat Leydig cells were stimulated with hCG (40 ng ml<sup>-1</sup>) alone or both of hCG and GnRHa (100 nmol l<sup>-1</sup>) for 12 h. The amount of testosterone in the culture media was measured by radioimmunoassay (RIA). Data are presented as mean  $\pm$  s.e.m. of three separate experiments. \*, P, 0.05, compared with the control.

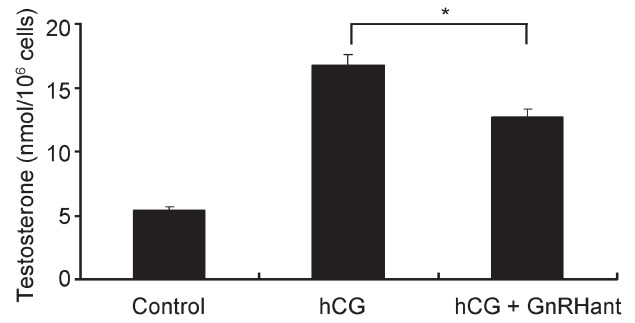

**Supplemental Figure 2** The effects of gonadotropin-releasing hormone antagonist (GnRHant) on hCG-stimulated testosterone production. Rat Leydig cells were stimulated with hCG (40 ng ml<sup>-1</sup>) alone or both of hCG and GnRHant (10 nmol l<sup>-1</sup>) for 12 h. The amount of testosterone in the culture media was measured by radioimmunoassay (RIA). Data are presented as mean  $\pm$  s.e.m. of three separate experiments. \*, P, 0.05.
